# Supplementary material
Source: Research Square preprint supplement (doi:10.21203/rs.3.rs-9686046/v1)
Supplement: Supplementary file 1 [file 4384d159247ac8160d0e9a39.docx]

**Supplementary Table 1. Air quality parameters in the SHS exposure chamber.**

| **Parameter** | **Concentration** | **Unit** |
| --- | --- | --- |
| PM2.5 | ≈500 | μg/m3 |
| PM10 | ≈800 | μg/m3 |
| PM1.0 | ≈250 | μg/m3 |
| CO | ≈30 | ppm |
| CO2 | ≈1000 | ppm |
| Total Particulate Matter | ≈1000 | μg/m3 |

Abbreviations: PM: Particulate Matter; CO: Carbon monoxide; CO2: Carbon dioxide.


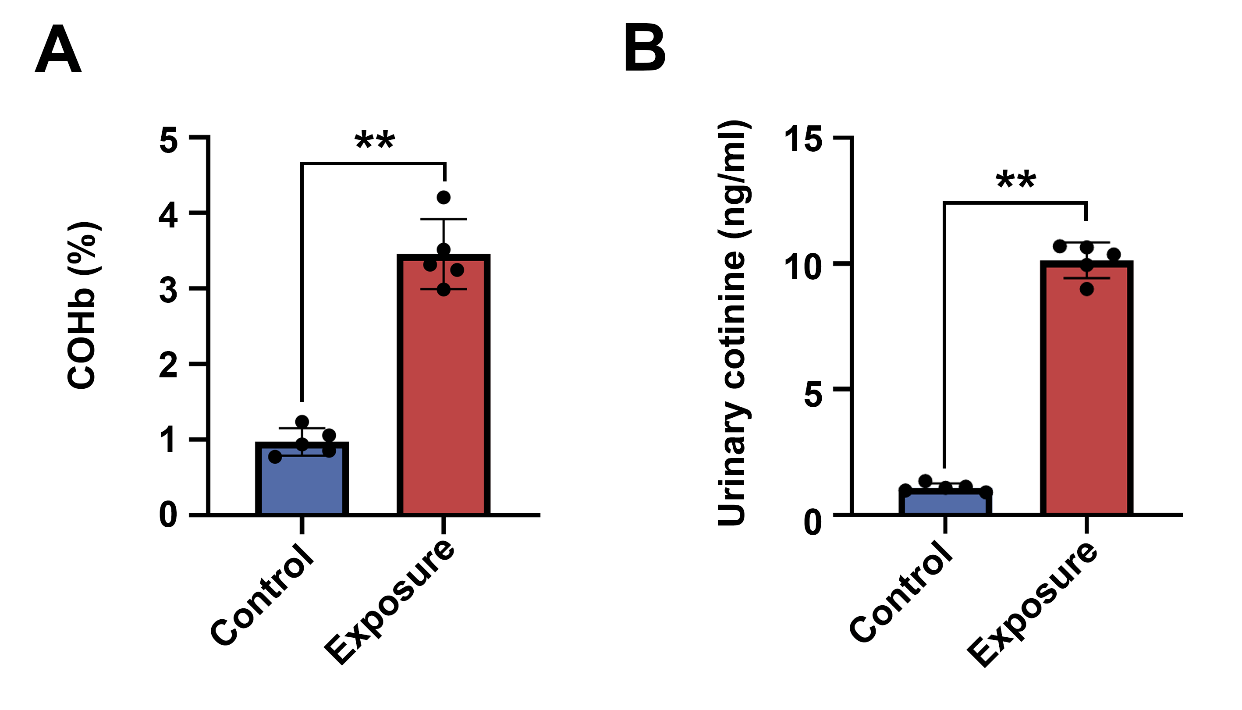


**Figure S1. Exposure markers.**

Blood COHb concentration (A) and urinary cotinine levels (B) measured in control and SHS-exposed mice.


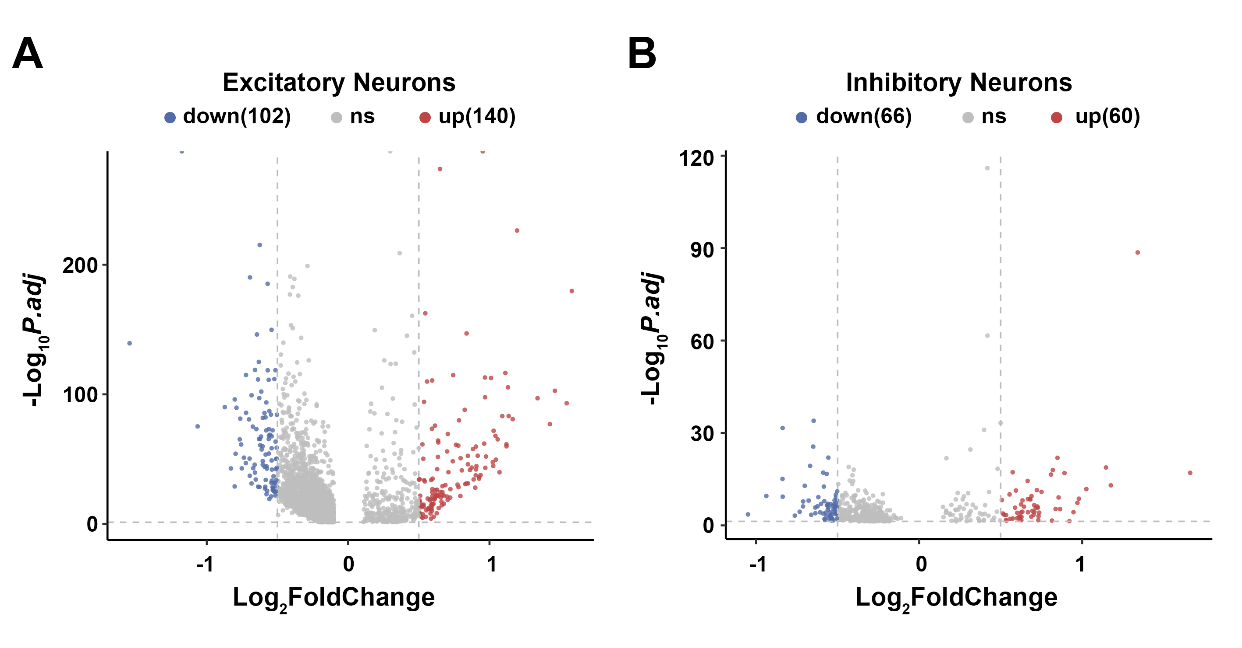


**Figure S2. Differentially expressed genes in hippocampal excitatory and inhibitory neurons following SHS exposure.**

(A, B) Volcano plots showing DEGs between SHS-exposed and control groups in excitatory neurons (A) and inhibitory neurons (B). Red and blue dots indicate significantly upregulated and downregulated genes, respectively, based on adjusted *p* values < 0.05 and | log2(fold change) | >0.5.


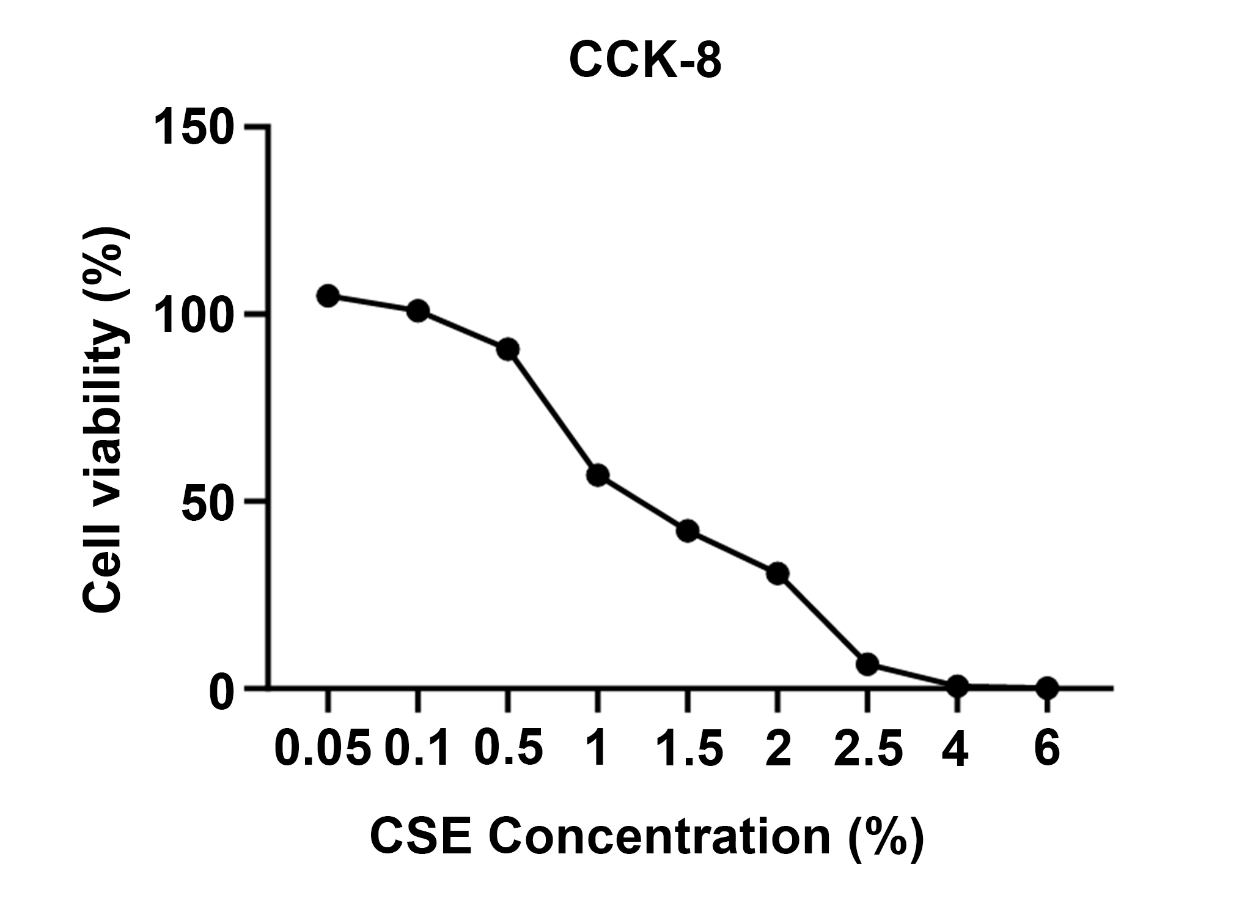


**Figure S3. Dose-dependent effect of CSE on HT22 cell** **viability.**

HT22 cells were treated with increasing concentrations of CSE (0.05–6%) for 1 h, and cell viability was measured by using a CCK-8 assay. The cell viability is expressed as a percentage relative to that of the untreated control.


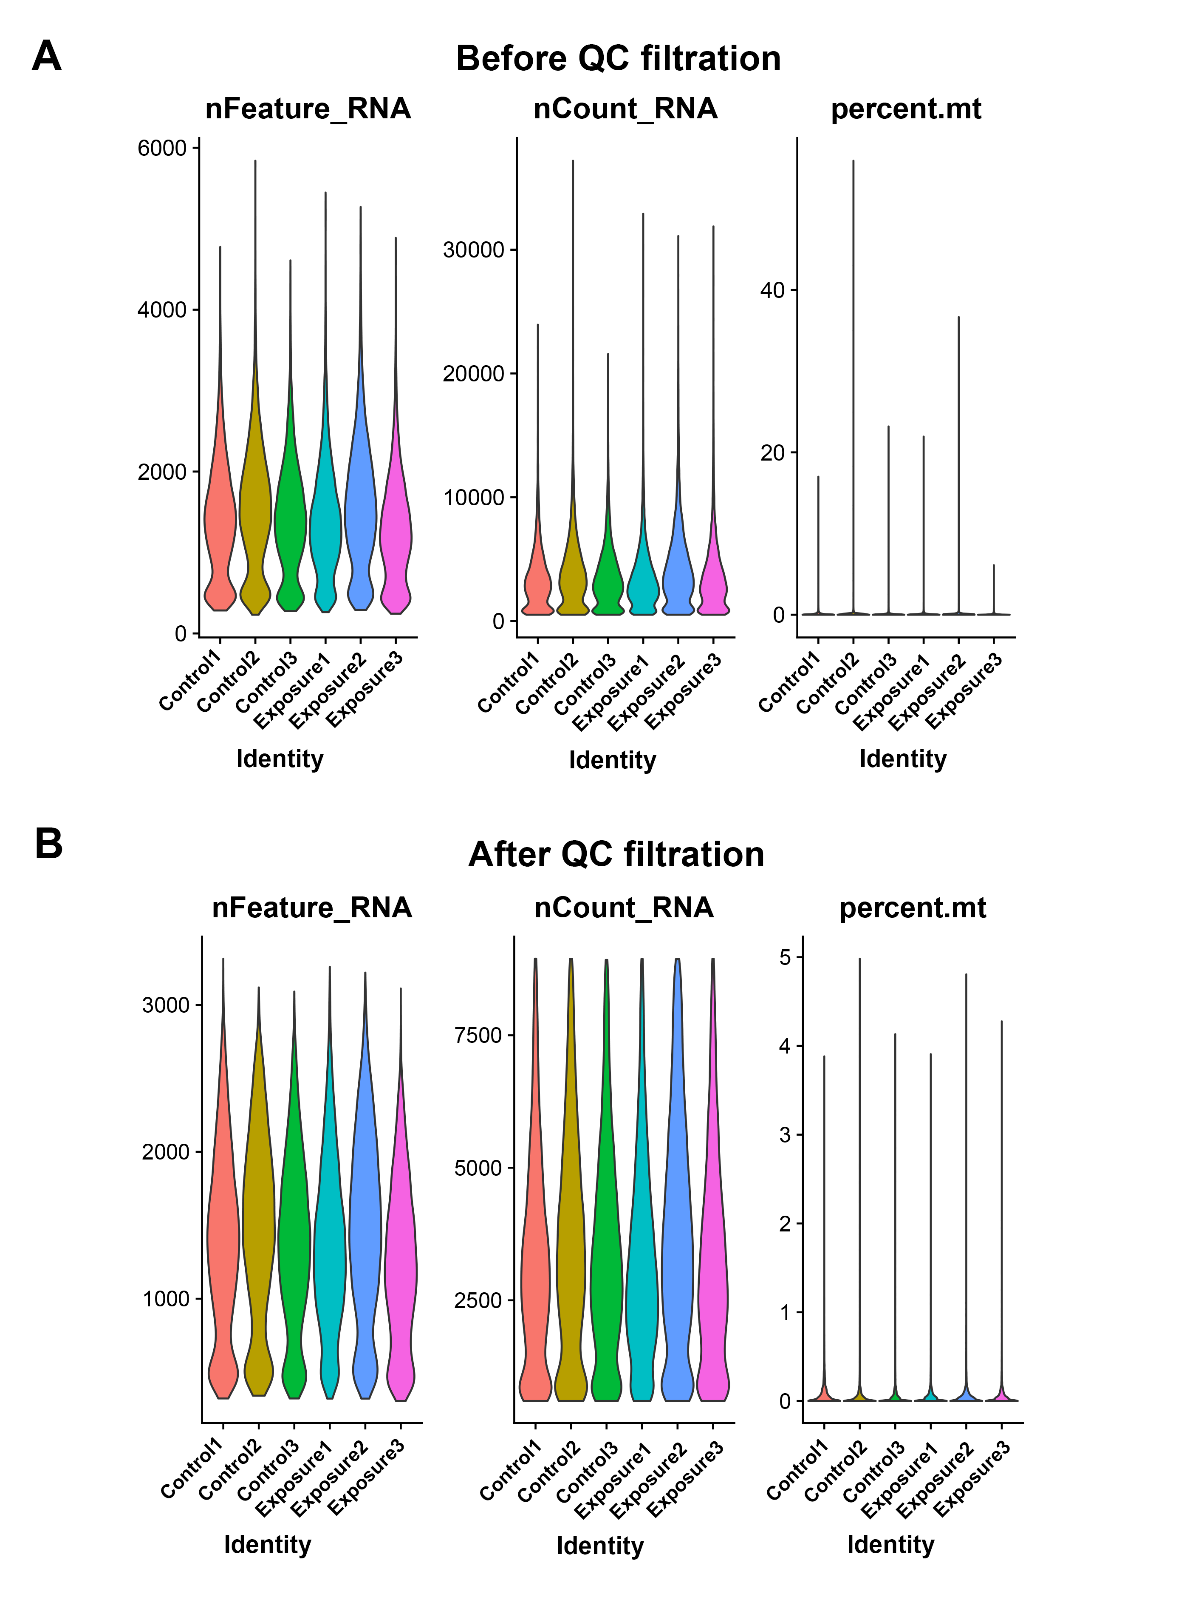


**Figure S4 Quality control metrics for the snRNA-seq data before and after filtration.**

(A) Violin plots showing the distribution of detected gene numbers (nFeature_RNA), total UMI counts (nCount_RNA), and mitochondrial gene percentage (percent.mt) for each sample prior to quality control (QC) filtration.

(B) Corresponding violin plots after QC filtration, demonstrating the removal of low-quality nuclei and a reduction in mitochondrial gene content across the samples.
